# Supplementary material
Source: Frontiers journal article supplement (https://www.frontiersin.org/articles/255724)
Supplement: Image_3.PDF [file Image_3.PDF]

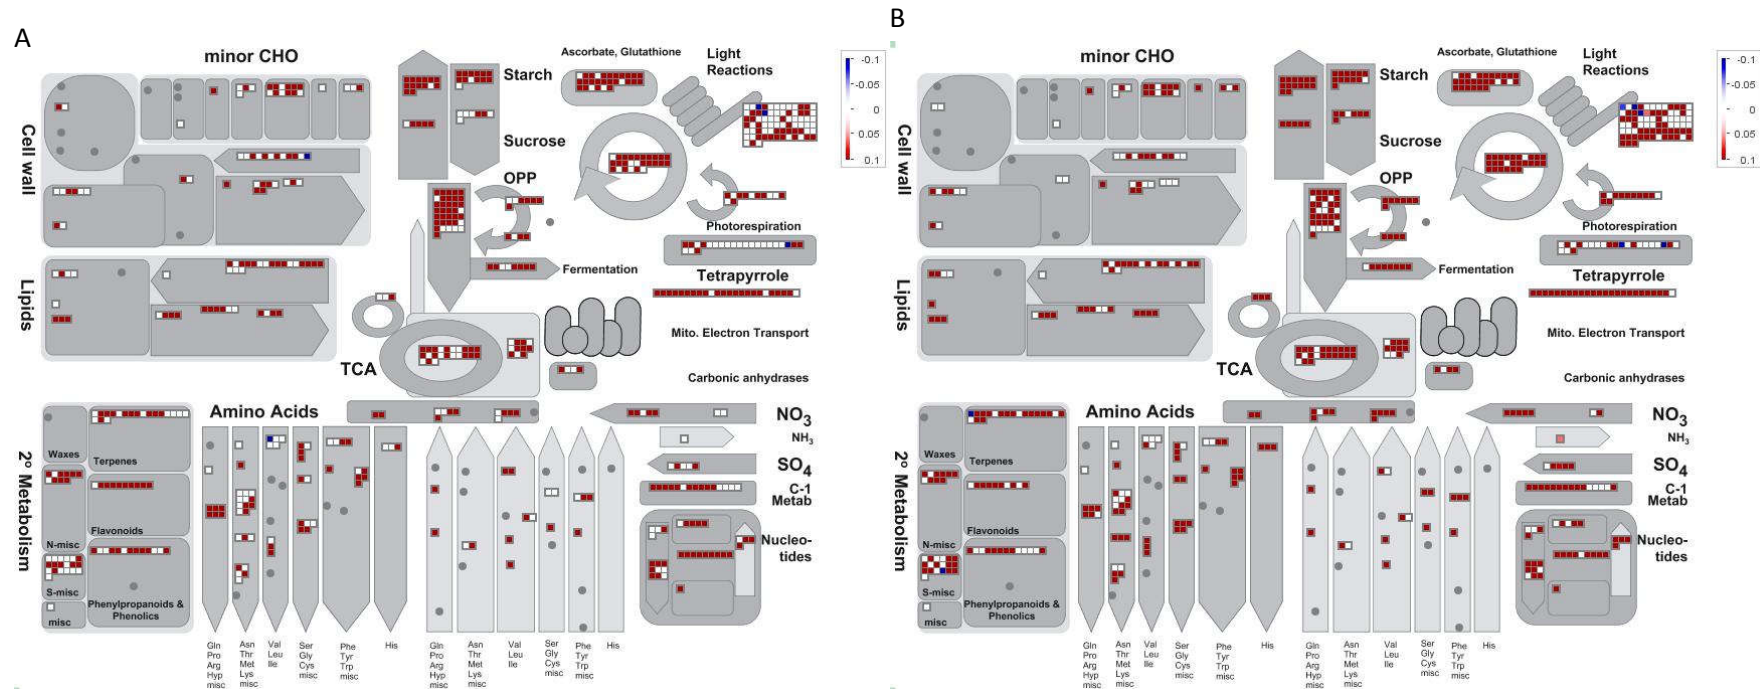

Supplementary Figure S3: Mapman metabolism overview detailing changes in the proteome in the WT (A) and *qpt2*(B)

Fold change data for the 1993 quantified proteins were submitted to Mapman. Red boxes denote proteins that were upregulated, white boxes are proteins that do not significantly change in abundance, and blue boxes are downregulated proteins.
