# Supplementary material
Source: Frontiers journal article supplement (https://www.frontiersin.org/articles/255724)
Supplement: Image_4.PDF [file Image_4.PDF]

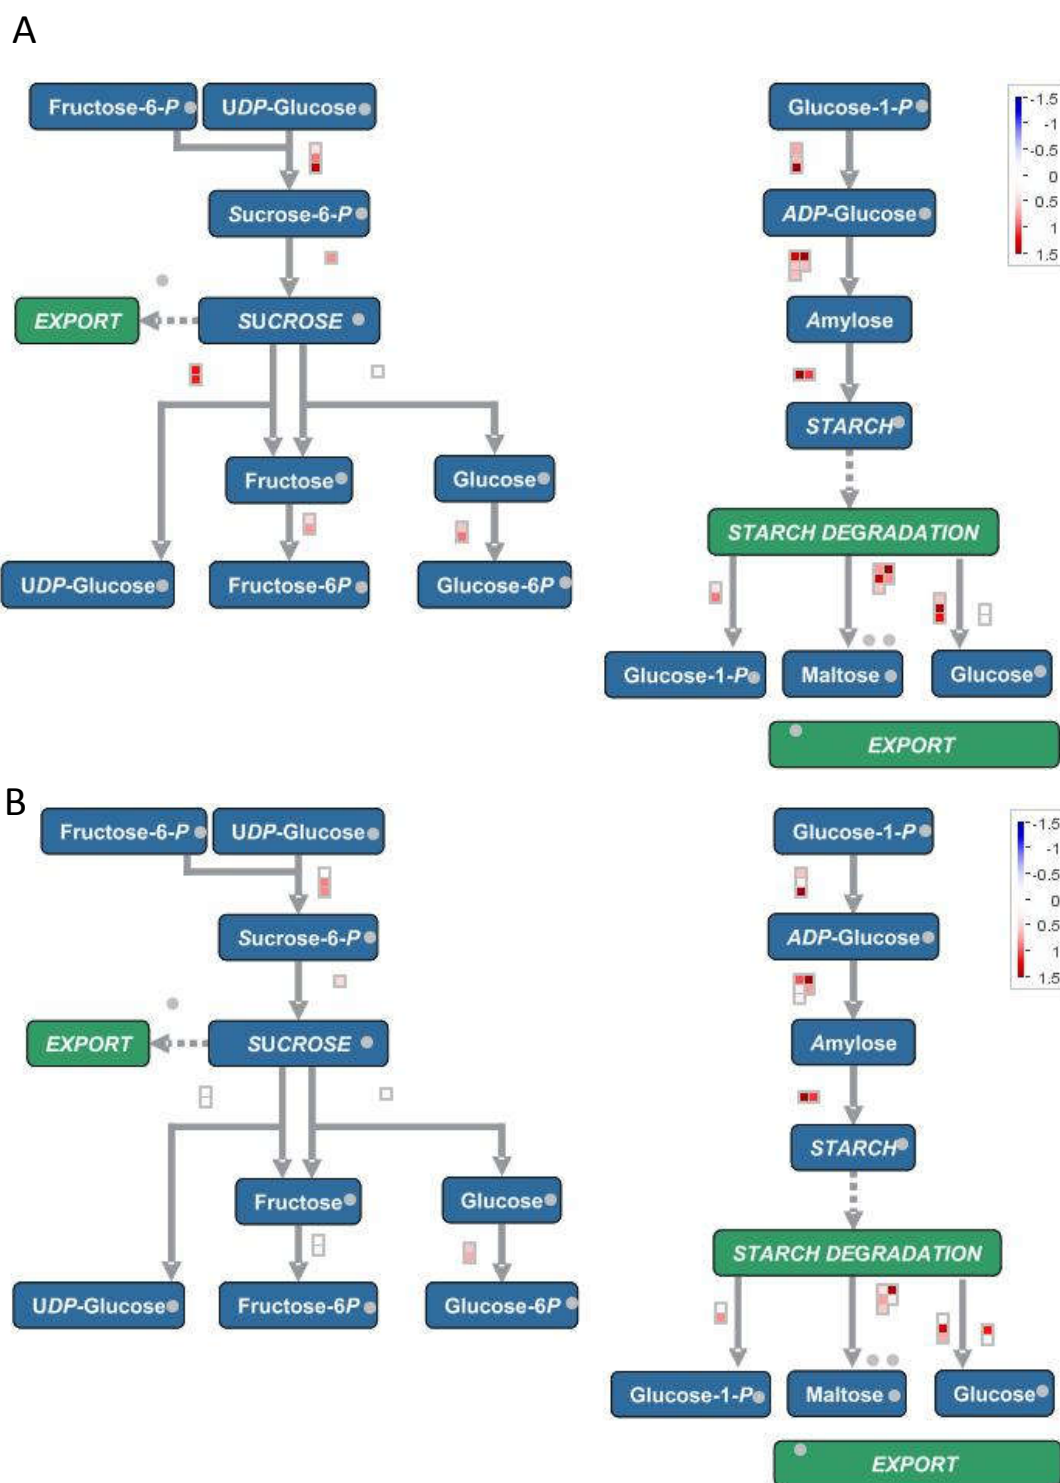

Supplementary Figure S4: Mapman metabolic diagram detailing the changes in Sucrose and Starch metabolism after high light acclimation

Fold change data for the WT (A; WTHL/WTLL) and *gpt2* (B; *gpt2HL/gpt2LL*) is shown. The major enzymes of sucrose (left) and starch (right) metabolism are shown. Boxes represent individual proteins, where red boxes are upregulated, white boxes are non changing and blue boxes are downregulated proteins. More intense colouring indicates a more severe fold change, according to the key to the top right of each figure.
